# Supplementary material for: Noble-metal loading reverses temperature dependent photocatalytic hydrogen generation in methanol–water solutions
Source: Royal Society of Chemistry journal article supplement (doi:10.1039/c6cc05689j), 2016-01-01
Supplement: c6cc05689j1.pdf [file c6cc05689j1.pdf]

# **Noble-metal loading reverses the temperature dependent photocatalytic hydrogen generation in methanol-water solution**

Liqun Ye,<sup>a,b</sup> Ka Him Chu,<sup>a</sup> Bo Wang,<sup>a</sup> Dan Wu,<sup>a</sup> Haiquan Xie,<sup>b</sup> Guocheng Huang,<sup>a</sup> Ho  
Yin Yip,<sup>a</sup> and Po Keung Wong<sup>a\*</sup>

<sup>a</sup> School of Life Sciences, The Chinese University of Hong Kong, Shatin, NT, Hong Kong SAR, China. (E-mail: [pkwong@cuhk.edu.hk](mailto:pkwong@cuhk.edu.hk); PK. Wong)

<sup>b</sup> Key Laboratory of Ecological Security for Water Source Region of Mid-line Project of South-to-North Water Diversion of Henan Province, College of Chemistry and Pharmaceutical Engineering, Nanyang Normal University, Nanyang 473061, China. (E-mail: [yeliquny@163.com](mailto:yeliquny@163.com); L. Ye)

## Part 1: Materials Preparation and characterization

### Materials Preparation

*TiO<sub>2</sub>*: Nano-TiO<sub>2</sub> (P25, 70% in anatase phase and 30% in rutile, particle diameters: 30–50 nm) was bought from Degussa Co.

*g-C<sub>3</sub>N<sub>4</sub>*: 5 g of thiourea powder was put into an alumina crucible with a cover and heated at 500 °C for 3 h in a muffle furnace (5 °C min<sup>-1</sup>). g-C<sub>3</sub>N<sub>4</sub> was obtained after cooling down to room temperature.[1,2]

*Pt loading photocatalysts*: 0.2 g *photocatalyst* was dispersed into 40 mL distilled water under vigorous stirring, and then 10 mL of methanol and 0.13 mL of H<sub>2</sub>PtCl<sub>6</sub>(0.077 M) solution were added to the suspension in sequence. The mixture was irradiated by a 300 W high-pressure Xenon lamp for 3 h under continuous stirring. After centrifugation, the sample was washed with water and dried at 80 °C for 10 h to obtain 1 wt% Pt-loaded photocatalysts.[3]

*MoS<sub>2</sub>/TiO<sub>2</sub>*: 0.2 g of the TiO<sub>2</sub> was dispersed in 18 mL of aqueous solution consisting of 30 mg of sodium molybdate dehydrate and 60 mg of thioacetamide to form a transparent solution. The mixed solution was then transferred into a 50 mL Teflon-lined stainless steel autoclave and then heated at 200 °C for 24 h in an electric oven. The gray product was collected via centrifugation and washed thoroughly with ethanol before drying at 80 °C for 12 h to give a 1.00 wt% MoS<sub>2</sub>/TiO<sub>2</sub> sample. All products were ground and heated to 400 °C for 2 h under a nitrogen atmosphere. [4]

*Ni(OH)<sub>2</sub>/TiO<sub>2</sub>*: 0.2 g of the TiO<sub>2</sub> P25 was dispersed in 50 mL of 1.0 M NaOH aqueous solution, and then a certain volume of 0.05M Ni(NO<sub>3</sub>)<sub>2</sub> aqueous solution was added to obtain a 1.00 wt% Ni(OH)<sub>2</sub>/TiO<sub>2</sub> sample. The mixed solutions were stirred for 24 h at room temperature. After that, the precipitates were collected by centrifuge and washed with distilled water and alcohol 10 times, respectively. The washed precipitates were dried at 80 °C for 24 h.[5]

### Characterization

X-ray diffraction patterns (XRD) were recorded by Smart Lab X-ray diffractometer

(Rigaku, Tokyo, Japan) operating at 40 mA and 40 kV using Cu K $\alpha$  radiation. The  $2\theta$  range of XRD patterns were taken over 10-60°. Transmission electron microscopy (TEM) images were obtained by a JEOL JEM-2100F (RH) Field Emission Electron Microscope working at 200 kV. X-ray photoelectron spectroscopy (XPS) data were obtained by Thermo ESCALAB 250XI X-ray photoelectron spectrometer (Al K $\alpha$ , 150 W, C 1s 284.8 eV). Brunauer-Emmett-Teller (BET) surface areas were measured by a quantachrome autosorb-1 automated gas adsorption systems at 77 K.

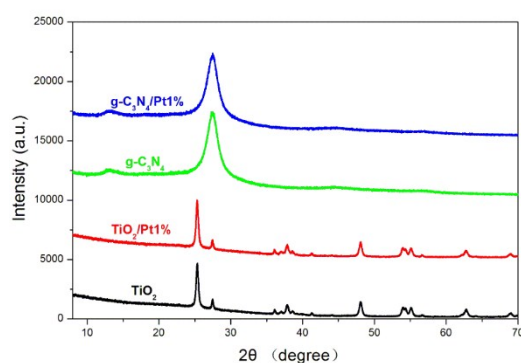

**Figure S1** XRD patterns of  $TiO_2$ ,  $TiO_2/Pt1\%$ ,  $g-C_3N_4$ , and  $g-C_3N_4/Pt1\%$ .

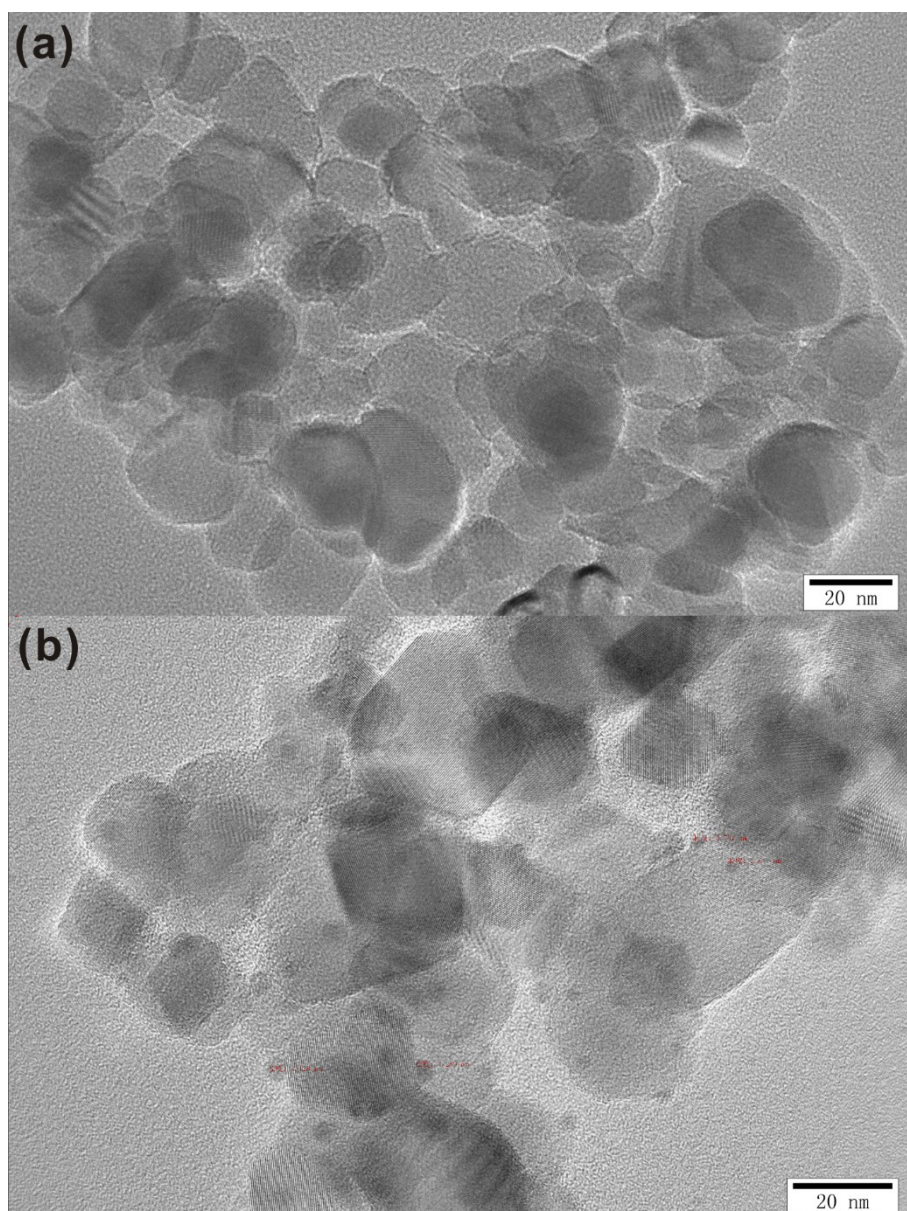

**Figure S2** TEM images of  $\text{TiO}_2$  (a) and  $\text{TiO}_2/\text{Pt}1\%$  (b).

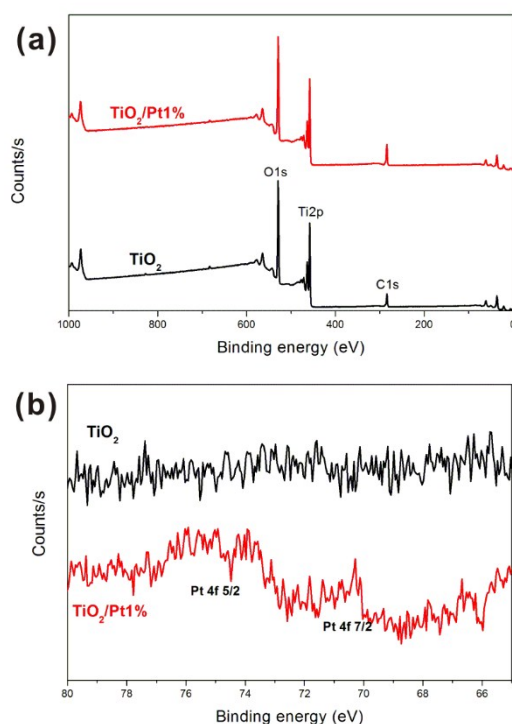

**Figure S3** Survey (a) and Pt4f (b) XPS spectra of  $\text{TiO}_2$  and  $\text{TiO}_2/\text{Pt1\%}$ .

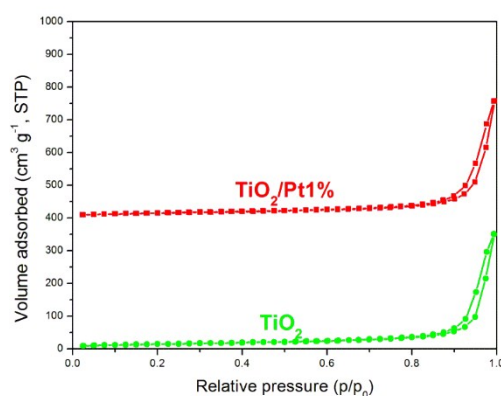

**Figure S4**  $\text{N}_2$  adsorption-desorption isotherms of  $\text{TiO}_2$  and  $\text{TiO}_2/\text{Pt1\%}$ .

#### Additional discussion:

XRD patterns (Figure S1) indicated that  $\text{TiO}_2$  and  $\text{g-C}_3\text{N}_4$  were the standard samples. After 1% Pt loading, the crystallographic information were not change. TEM image displayed the size of  $\text{TiO}_2$  were about 25-50 nm (Figure S2a). The size of Pt nanoparticle were about 3-5 nm on the surface of  $\text{TiO}_2$  (Figure S2b). And the existence of Pt also was proved by the XPS spectra as shown in Figure S3. BET surface area of  $\text{TiO}_2$  and  $\text{TiO}_2/\text{Pt1\%}$  were 53.0 and 53.8  $\text{m}^2 \text{g}^{-1}$  (Figure S4). It indicated that Pt loading did not change the surface area.

## Part 2: Photocatalytic H<sub>2</sub> generation

### Experimental Procedure

The photocatalytic H<sub>2</sub> production experiments were performed in Labsolar-IIIAG closed gas system (Beijing Perfect Light Technology Co., Ltd China) maintaining the photo-reaction temperature at 15 °C with a low-temperature thermostat bath (Poly Science, USA). In the photo-reaction system, 20 mg of samples was suspended in 50 mL of DI water containing methanol as an electron donor. To identify and quantify the gases produced, a volume of 1.5 mL of gas was hourly sampled and measured by a gas chromatography (GC 7806, Beijing Shiweipx analysis instrument co., LTD China) equipped with a thermal conductivity detector (TCD) and a 5 Å molecular sieve column, where N<sub>2</sub> was used as the carrier gas. At each time interval, 1 mL of gas was taken from the reaction cell for qualitative analysis using GC9790II gas chromatography (GC, Zhejiang Fuli Analytical Instrument Co., Ltd China) equipped with a flame ionization detector (FID, GDX-502 columns). The quantification of the CO and CO<sub>2</sub> yield were based on a calibration curve.

### Apparent quantum efficiencies (AQE) calculations

The apparent quantum efficiency (AQE) was measured under the same photocatalytic reaction condition, except for the incident light wavelength. The H<sub>2</sub> yields of 1 h photoreaction under monochromatic light or LED light (365 nm) were measured. AQE was calculated by the following equation:

$$\begin{aligned} AQE &= \frac{N_{H_2}}{N_p} = \frac{2 \times \text{the number of evolved } H_2 \text{ molecules}}{\text{the number of incident photons}} \times 100\% \\ &= \frac{2 \times N_a \times M_{H_2}}{\frac{PSt\lambda}{hc}} = \frac{2 \times 6.02 \times 10^{23} \times M_{H_2}}{\frac{PS \times 3600 \times 365 \times 10^{-9}}{6.6626 \times 10^{-34} \times 3 \times 10^8}} \end{aligned}$$

**Monochromatic light of 300 W Xenon lamp:  $\lambda = 365 \pm 5$  nm**

Experimental conditions: TiO<sub>2</sub>/Pt1% 30mg; 25 mL H<sub>2</sub>O; 25 mL CH<sub>3</sub>OH; 1h irradiation.

Power of 365 nm of Xenon lamp (P): 1.95 mW/cm<sup>2</sup>; Active area (S): 19.6 cm<sup>2</sup>

M<sub>H2</sub> at 10 °C: 86.2 μmol                      M<sub>H2</sub> at 20 °C: 118 μmol

M<sub>H2</sub> at 30 °C: 167 μmol                      M<sub>H2</sub> at 40 °C: 399 μmol

$$N_p = (1.95 \times 10^{-3} \times 19.6 \times 3600 \times 365 \times 10^{-9}) / (6.626 \times 10^{-34} \times 3 \times 10^8) = 2.53 \times 10^{20}$$

$$N_{H_2} \text{ at } 10^\circ\text{C} = N_{10} = 2 \times 6.02 \times 10^{23} \times 86.2 \times 10^{-6} = 1.04 \times 10^{20}$$

$$N_{20} = 2 \times 6.02 \times 10^{23} \times 118 \times 10^{-6} = 1.42 \times 10^{20}$$

$$N_{30} = 2 \times 6.02 \times 10^{23} \times 167 \times 10^{-6} = 2.01 \times 10^{20}$$

$$N_{40} = 2 \times 6.02 \times 10^{23} \times 399 \times 10^{-6} = 4.80 \times 10^{20}$$

$$\text{AQE at } 10^\circ\text{C} = QE_{10} = N_{10} / N_p = 1.04 / 2.53 = 41.1\%$$

$$QE_{20} = N_{20} / N_p = 1.42 / 2.53 = 56.1\%$$

$$QE_{30} = N_{30} / N_p = 2.01 / 2.53 = 79.4\%$$

$$QE_{40} = N_{40} / N_p = 4.80 / 2.53 = 189.7\%$$

**Table S1** Quantum efficiencies (QE) calculation data.

| Temperature<br>(°C) | band pass filter $\lambda = 365 \pm 5$ nm |                                         |                                        |            | LED $\lambda = 365$ nm    |                                         |                                        |            |
|---------------------|-------------------------------------------|-----------------------------------------|----------------------------------------|------------|---------------------------|-----------------------------------------|----------------------------------------|------------|
|                     | M <sub>H2</sub><br>(μmol)                 | N <sub>H2</sub><br>( $\times 10^{20}$ ) | N <sub>p</sub><br>( $\times 10^{20}$ ) | AQE<br>(%) | M <sub>H2</sub><br>(μmol) | N <sub>H2</sub><br>( $\times 10^{20}$ ) | N <sub>p</sub><br>( $\times 10^{20}$ ) | AQE<br>(%) |
| 10                  | 86.2                                      | 1.04                                    | 2.53                                   | 41.1       | 423                       | 5.09                                    | 12.98                                  | 39.2       |
| 20                  | 118                                       | 1.42                                    |                                        | 56.1       | 658                       | 7.92                                    |                                        | 61.0       |
| 30                  | 167                                       | 2.01                                    |                                        | 79.4       | 926                       | 11.14                                   |                                        | 85.8       |
| 40                  | 399                                       | 4.80                                    |                                        | 189.7      | 2195                      | 26.41                                   |                                        | 203.5      |

**365 LED lamp:  $\lambda = 365$  nm**

Experimental conditions: TiO<sub>2</sub>/Pt1% 30mg; 25 mL H<sub>2</sub>O; 25 mL CH<sub>3</sub>OH; 1h irradiation.

Power of 365 nm of Xenon lamp (P): 6.04 mW/cm<sup>2</sup>; Active area (S): 32.5 cm<sup>2</sup>

M<sub>H2</sub> at 10 °C: 423 μmol                      M<sub>H2</sub> at 20 °C: 658 μmol

$M_{H_2}$  at 30 °C: 926  $\mu\text{mol}$

$M_{H_2}$  at 40 °C: 2195  $\mu\text{mol}$

$$N_p = (6.04 \times 10^{-3} \times 32.5 \times 3600 \times 365 \times 10^{-9}) / (6.626 \times 10^{-34} \times 3 \times 10^8) = 12.98 \times 10^{20}$$

$$N_{H_2} \text{ at } 10^\circ\text{C} = N_{10} = 2 \times 6.02 \times 10^{23} \times 423 \times 10^{-6} = 5.09 \times 10^{20}$$

$$N_{20} = 2 \times 6.02 \times 10^{23} \times 658 \times 10^{-6} = 7.92 \times 10^{20}$$

$$N_{30} = 2 \times 6.02 \times 10^{23} \times 926 \times 10^{-6} = 11.14 \times 10^{20}$$

$$N_{40} = 2 \times 6.02 \times 10^{23} \times 2195 \times 10^{-6} = 26.41 \times 10^{20}$$

$$\text{AQE at } 10^\circ\text{C} = \text{QE}_{10} = N_{10} / N_p = 5.09 / 12.98 = 39.2\%$$

$$\text{QE}_{20} = N_{20} / N_p = 7.92 / 12.98 = 61.0\%$$

$$\text{QE}_{30} = N_{30} / N_p = 11.14 / 12.98 = 85.8\%$$

$$\text{QE}_{40} = N_{40} / N_p = 26.41 / 12.98 = 203.5\%$$

### Light to hydrogen (LTH) conversion efficiency calculations

The light energy conversion was evaluated by using 300 W Xenon lamp as the light source 1 h of illumination, the total incident power over the 19.6 cm<sup>2</sup> irradiation area was 24.6 W.

$$\text{So, } E_{\text{light}} = T \times W = 3600 \times 24.6 = 8.856 \times 10^4 \text{ J.}$$

$E_F$  was the energy generated by water splitting

$$E_F = N_a \times E_{\text{water}} \times E_e \times M_{H_2} = 6.02 \times 10^{23} \times 2.46 \times 1.609 \times 10^{-19} \times M_{H_2}$$

The “light -to-hydrogen” conversion efficiency (LTH) was determined to be:

$\text{LTH} = (\text{Energy of generation of hydrogen by water splitting}) / (\text{light energy irradiating the reaction cell}).$

$$\text{LTH} = E_F / E_{\text{light}}$$

**Table S2** Light to hydrogen (LTH) conversion efficiency calculation data.

| Temperature<br>(°C) | $M_{H_2}$ ( $\mu\text{mol}$ ) | $E_F$ (J) | $E_{\text{light}}$ (J) | LTH<br>(%) |
|---------------------|-------------------------------|-----------|------------------------|------------|
| 10                  | 379                           | 90.31     | $8.856 \times 10^4$    | 0.10       |
| 20                  | 593                           | 141.30    |                        | 0.16       |
| 30                  | 1032                          | 245.91    |                        | 0.28       |



|    |      |        |  |      |
|----|------|--------|--|------|
| 40 | 1850 | 440.82 |  | 0.50 |
|----|------|--------|--|------|

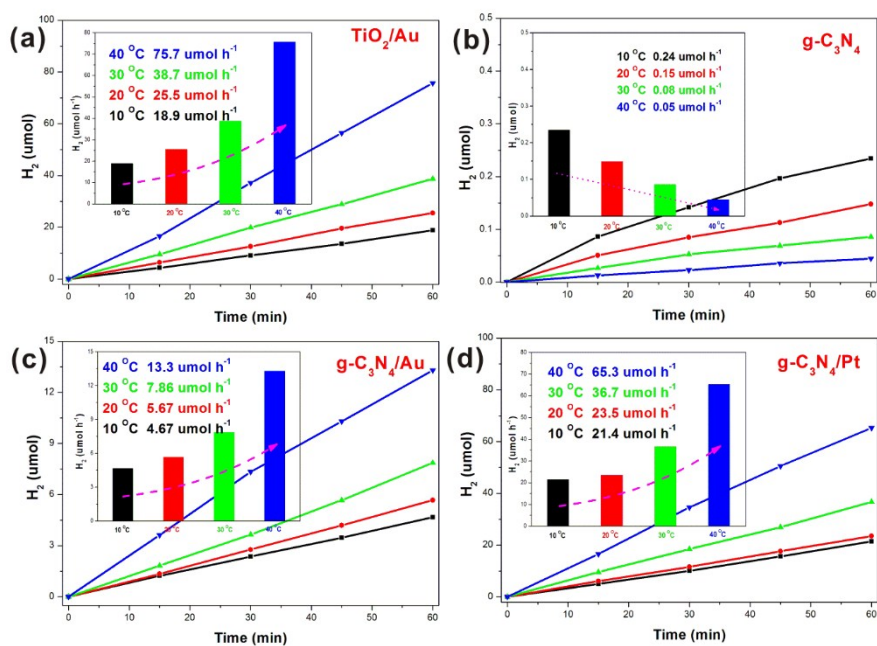

**Figure S5** The photocatalytic activity for  $\text{H}_2$  generation at different temperature (10 °C, 20 °C, 30 °C, 40 °C) over 20 mg  $\text{TiO}_2/\text{Au}1\%$  (a),  $\text{g-C}_3\text{N}_4$ (b),  $\text{g-C}_3\text{N}_4/\text{Pt}1\%$  (c) and  $\text{g-C}_3\text{N}_4/\text{Au}1\%$  (d) in  $\text{CH}_3\text{OH-H}_2\text{O}$  (10% V/V) solution under UV-visible light (320-800 nm).

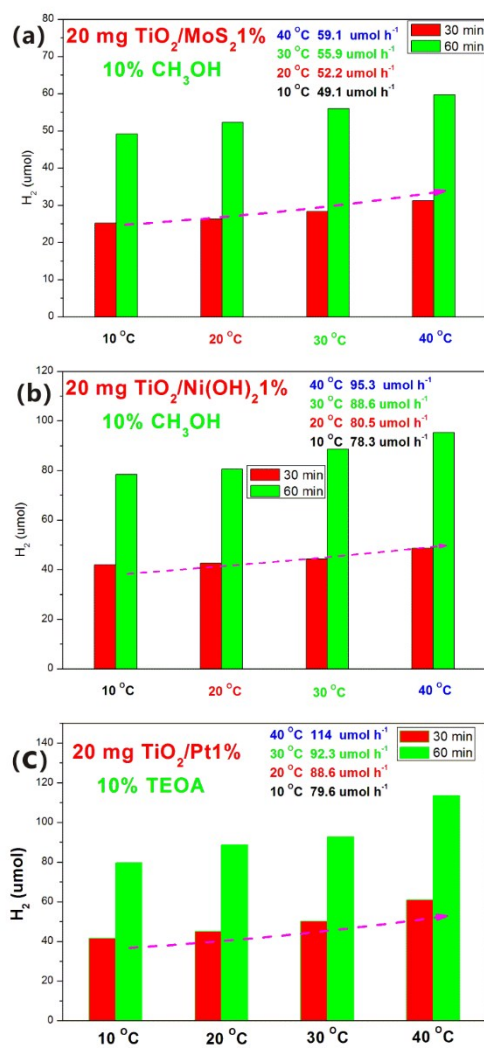

**Figure S6** The control experiments: (a) MoS<sub>2</sub>; (b) Ni(OH)<sub>2</sub>; (c) TEOA solution.

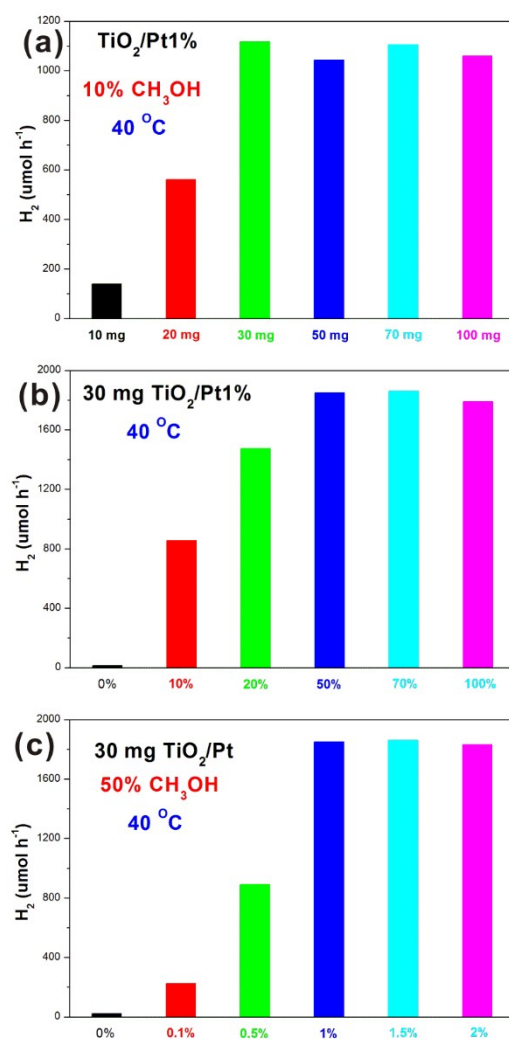

**Figure S7** The effects of dosage (a), concentration of  $\text{CH}_3\text{OH}$  (b), and amount of Pt-loading amount (c) at 40°C under UV-visible light (320-800 nm).

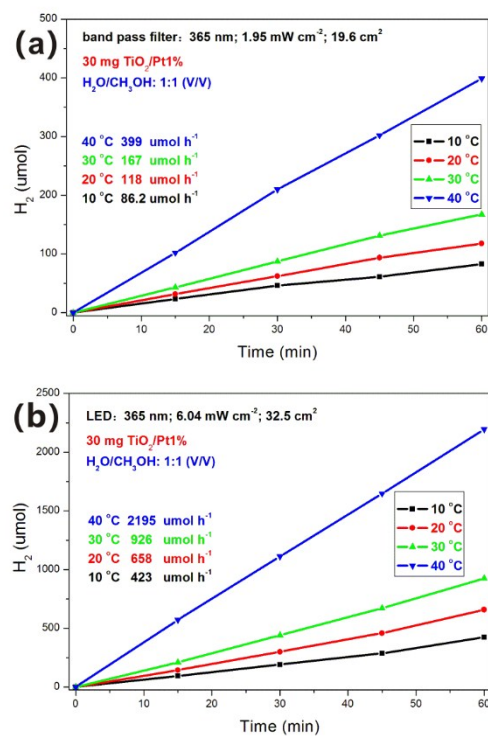

**Figure S8** The photocatalytic activity for H<sub>2</sub> generation at different temperature (10, 20, 30, and 40°C) over TiO<sub>2</sub>/Pt1% (30 mg) in CH<sub>3</sub>OH-H<sub>2</sub>O (50% V/V) solution under 365 nm irradiation (a for a Xenon lamp with a band pass filter and b for LED light).

### Part 3: DRS and PL spectrum analysis

UV-vis diffuse reflectance spectroscopy (DRS) was carried out using UV-Vis spectrometer (Perkin Elmer, Lambda 650s, BaSO<sub>4</sub> as a reference). Photoluminescence (PL) spectra were recorded by a Multifunction Steady State and Transient State Fluorescence Spectrometer (FES920, Edinburgh Instruments) at 381 nm with excitation at 252 nm.

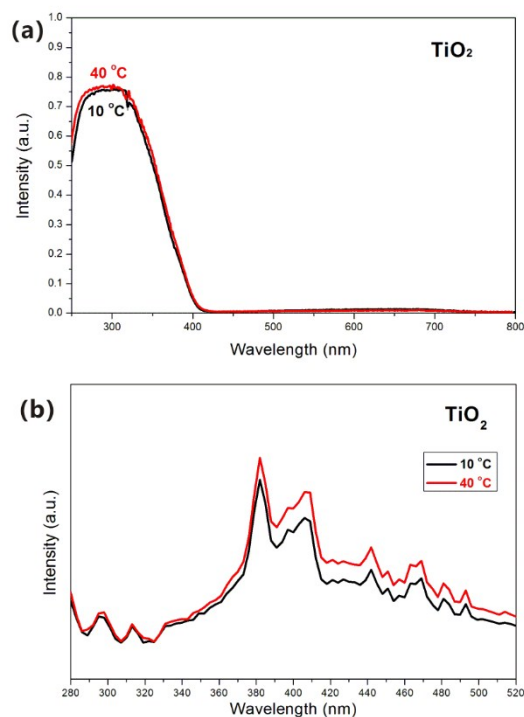

**Figure S9** UV-vis diffuse reflectance spectroscopy and PL spectra of TiO<sub>2</sub> at 10 and 40 °C.

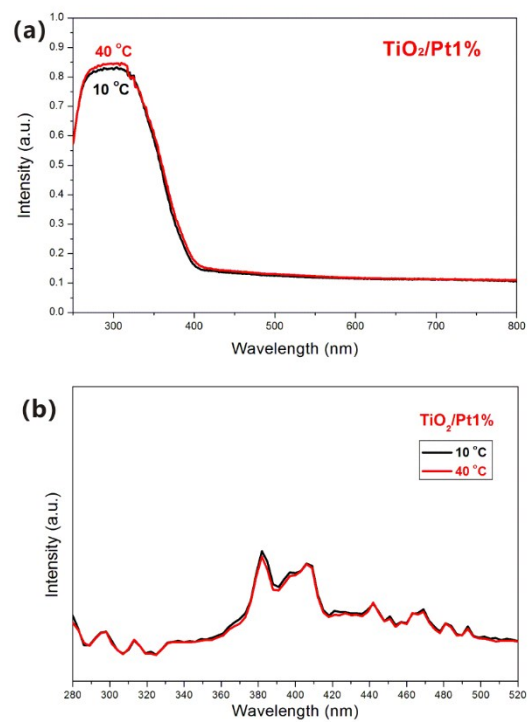

**Figure S11** UV-vis diffuse reflectance spectroscopy and PL spectra of  $\text{TiO}_2/\text{Pt1\%}$  at 10 and 40 °C.

#### Part 4: Photoelectrochemical measurement

The transient photocurrent responses and electrochemical impedance spectra (EIS) of the samples were determined using a CHI630E electrochemical working station (CHI Instruments, Shanghai, China) in a three-electrode quartz cell with  $\text{Na}_2\text{SO}_4$  (0.1 M) electrolyte solution. Samples were deposited on a fluorinated-tin-oxide (FTO) conducting glass as the working electrode. Ag/AgCl and Pt were used as the reference and the counter electrodes, respectively.

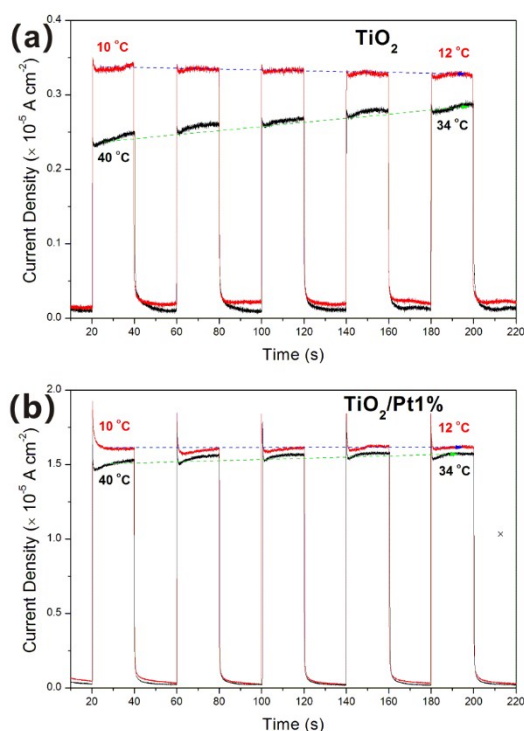

**Figure S10** Photocurrent of  $\text{TiO}_2$  film (a) and  $\text{TiO}_2/\text{Pt1\%}$  film (b) at 10 and 40 °C  $\text{Na}_2\text{SO}_4$  solution ( $0.1 \text{ mol L}^{-1}$ ) under UV-visible light (320-800 nm).

## Part 5: Thermodynamic analysis

**Table S3** Thermodynamic data of H<sub>2</sub>O (l), HCOOH (l), CO (g), CO<sub>2</sub> (g) and H<sub>2</sub> (g) at 298.15K.

|                                                     | H <sub>2</sub> O (l) | HCOOH (l) | CO (g)  | CO <sub>2</sub> (g) | H <sub>2</sub> (g) |
|-----------------------------------------------------|----------------------|-----------|---------|---------------------|--------------------|
| $\Delta_f H_m^\theta$ (kJ mol <sup>-1</sup> )       | -285.83              | -424.72   | -110.53 | -393.51             | 0                  |
| $\Delta_f G_m^\theta$ (kJ mol <sup>-1</sup> )       | -237.13              | -361.35   | -137.17 | -394.36             | 0                  |
| $S_m^\theta$ (J mol <sup>-1</sup> K <sup>-1</sup> ) | 69.91                | 128.95    | 197.67  | 213.74              | 130.68             |

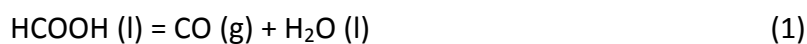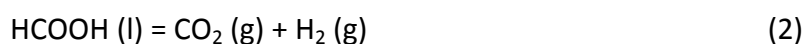

$$\Delta G = \Delta_f H_m^\theta - T \Delta S_m^\theta$$

$$\Delta G_1 = \Delta H - T\Delta S = (-110.53-285.83+424.72) - T (69.91+197.67-128.95) 10^{-3}$$

$$\Delta G_1 = 28.36-0.13863T$$

$$\Delta G_2 = \Delta H - T\Delta S = (-393.51+0+424.72) - T (213.74+130.68-128.95) 10^{-3}$$

$$= 31.21-0.21547T$$

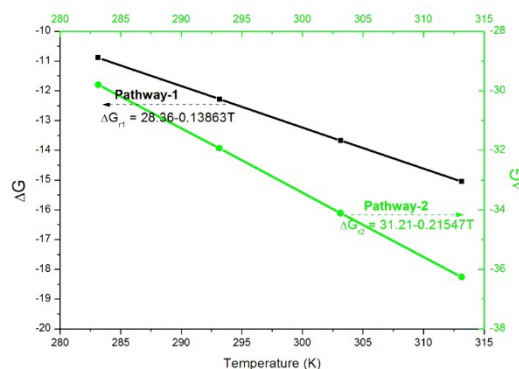

**Figure S12**  $K^\theta$  of pathway-1 and pathway-2 at 10-40 °C

$$\Delta_r G_m^\theta = -RT \ln K^\theta$$

**Table S4**  $\Delta_r G_m^\theta$  and the corresponding  $K^\theta$  of pathway-1 at different.

| Temperature                                   | 283.15K | 293.15K | 303.15K | 313.15K |
|-----------------------------------------------|---------|---------|---------|---------|
| $\Delta_r G_m^\theta$ (kJ mol <sup>-1</sup> ) | -10.89  | -12.28  | -13.67  | -15.05  |
| $K^\theta$                                    | 102     | 154     | 227     | 324     |



**Table S5**  $\Delta_r G_m^\theta$  and the corresponding  $K^\theta$  of pathway-2 at different

| temperature                                   | 283.15K | 293.15K | 303.15K | 313.15K   |
|-----------------------------------------------|---------|---------|---------|-----------|
| $\Delta_r G_m^\theta$ (kJ mol <sup>-1</sup> ) | -29.8   | -31.93  | -34.11  | -36.26    |
| $K^\theta$                                    | 314 488 | 489 351 | 753 878 | 1 118 221 |

## Part 6: References

- [1] L. Ye, J. Liu, K. Deng, T. Peng, L. Zan, Facets Coupling of BiOBr-g-C<sub>3</sub>N<sub>4</sub> Composite Photocatalyst for Enhanced Visible-light-driven Photocatalytic Activity, *Appl. Catal. B: Environ*, 2013, 142-143, 1-7.
- [2] Y. Bai, L. Ye, L. Wang, X. Shi, P. Wang, W. Bai, P. K. Wong, g-C<sub>3</sub>N<sub>4</sub>/Bi<sub>4</sub>O<sub>5</sub>I<sub>2</sub> Heterojunction with I<sub>3</sub><sup>-</sup>/I<sup>-</sup> Redox Mediator for Enhanced Photocatalytic CO<sub>2</sub> Conversion, *Appl. Catal. B: Environ*, 2016, 194, 98-104.
- [3] J. Mao, L. Ye, K. Li, X. Zhang, J. Liu, T. Peng, L. Zan, Pt-loading reverses the photocatalytic activity order of anatase TiO<sub>2</sub> {001} and {010} facets for photoreduction of CO<sub>2</sub> to CH<sub>4</sub>, *Appl. Catal. B: Environ*, 2014, 144, 855-862.
- [4] Y. J. Yuan, Z. J. Ye, H. W. Lu, B. Hu, Y. H. Li, D. Q. Chen, J. S. Zhong, Z. T. Yu, Z. G. Zou, Constructing Anatase TiO<sub>2</sub> Nanosheets with Exposed (001) Facets/Layered MoS<sub>2</sub> Two-Dimensional Nanojunctions for Enhanced Solar Hydrogen Generation, *ACS Catal*, 2016, 6, 532–541.
- [5] J. Yu, Y. Hai, B. Cheng, Enhanced Photocatalytic H<sub>2</sub>-Production Activity of TiO<sub>2</sub> by Ni(OH)<sub>2</sub> Cluster Modification, *J. Phys. Chem. C*, 2011, 115, 4953–4958
